# Supplementary material
Source: ML conference proceedings conference paper supplement (https://openreview.net/forum?id=mCWZj7pa0M)

$\sigma = 0.25$ 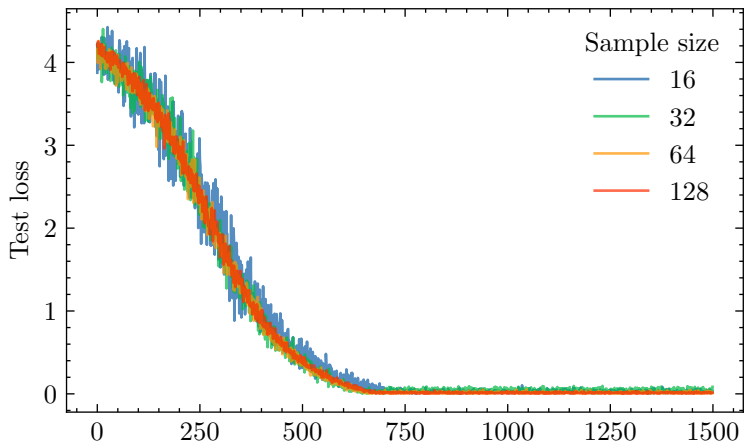 $\sigma = 0.5$ 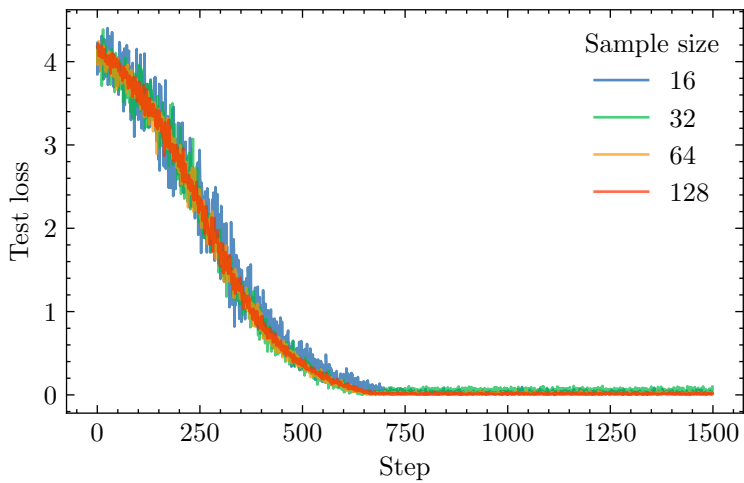 $\sigma = 0.25$ 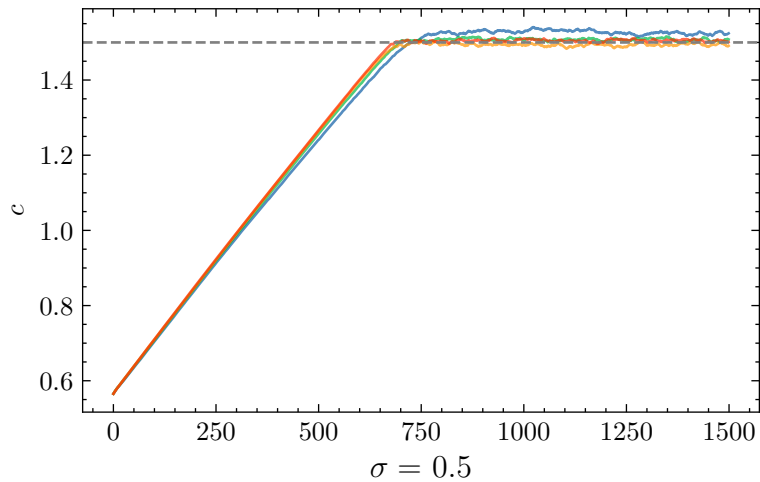 $\sigma = 0.5$ 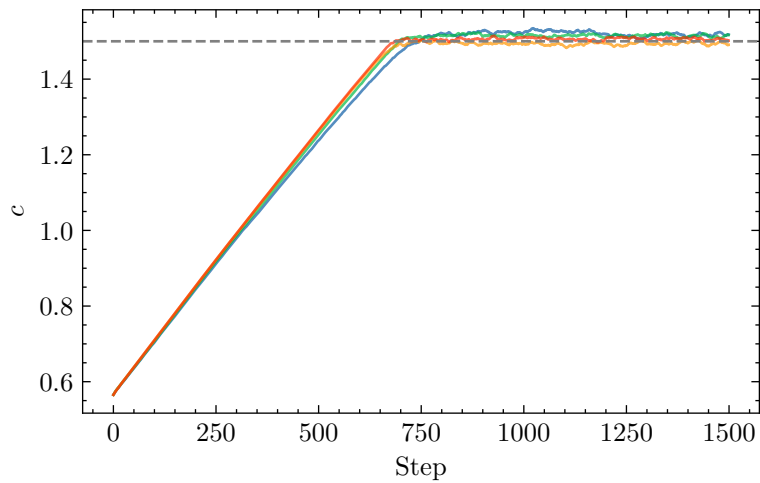

Supplement: supplementary_material [file attachment]

Test loss

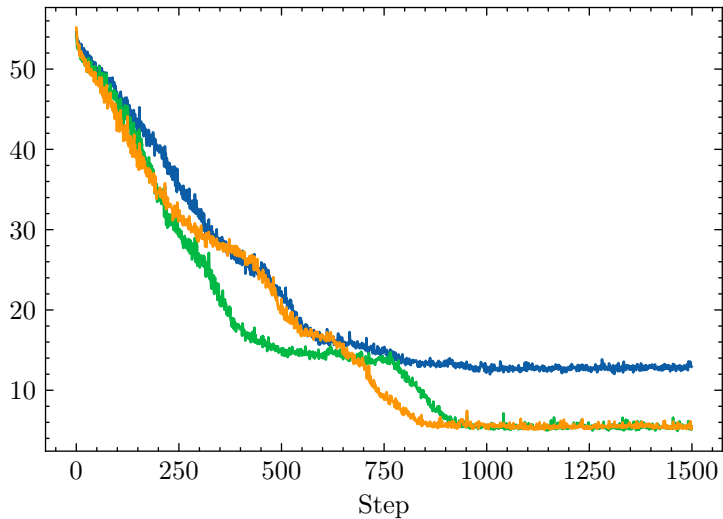 $\|\hat{w}_{step} - w_{true}\|$ 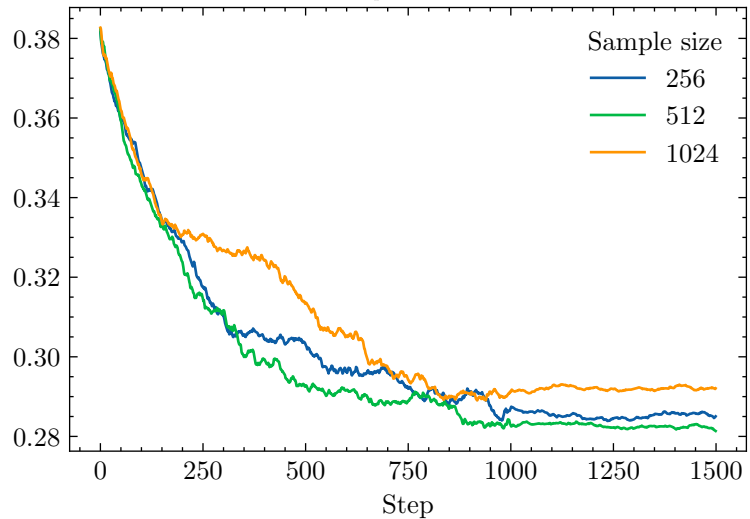

Supplement: supplementary_material [file attachment]

$\sigma = 0.25$ 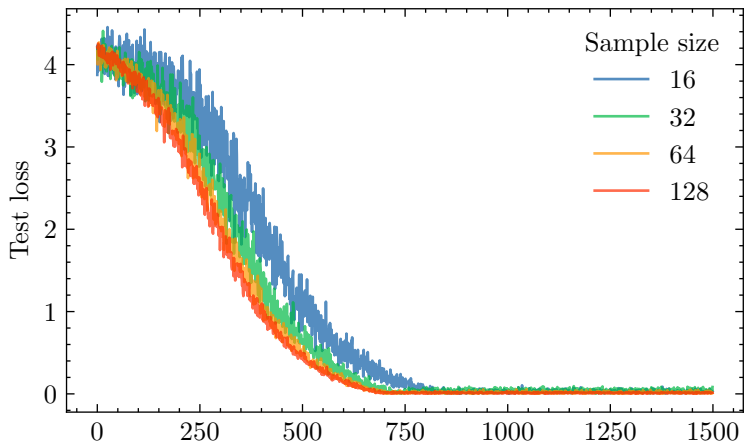 $\sigma = 0.5$ 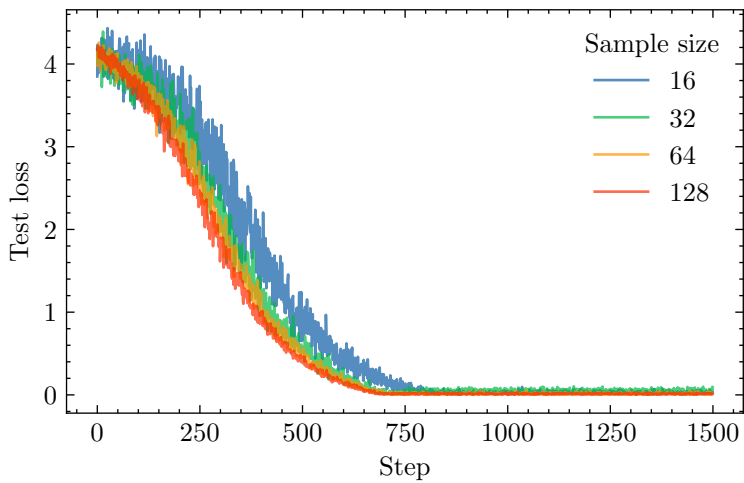 $\sigma = 0.25$ 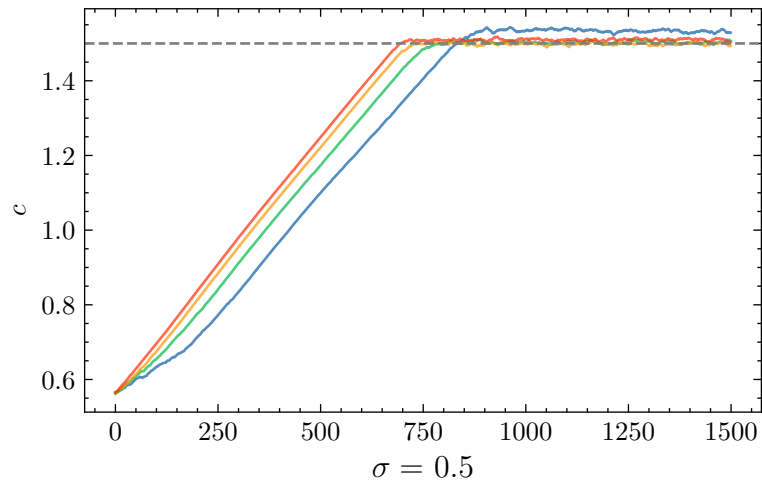 $\sigma = 0.5$ 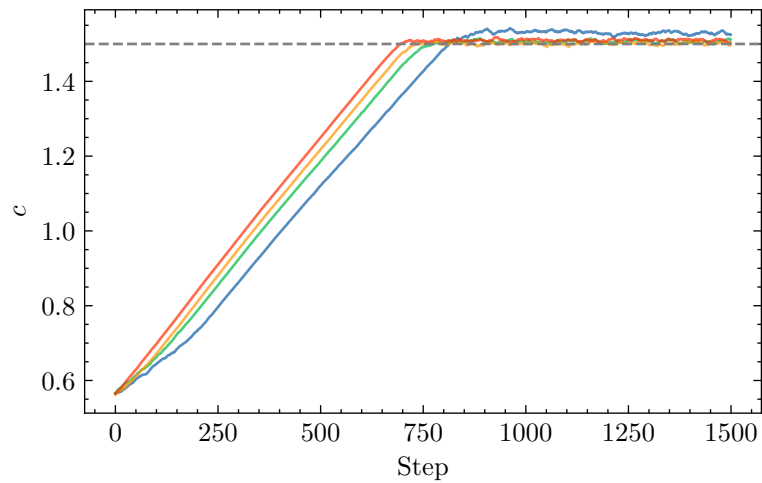

Supplement: supplementary_material [file attachment]
